# Supplementary material for: Dopamine neurons learn relative chosen value from probabilistic rewards
Source: eLife journal article supplement (doi:10.7554/elife.18044), 2016-10-27
Supplement: supp [file elife-18044-supp-v1.zip]

Archive with 8 entries (8 files):
- elife_poa_e18044_Supplementary_File_1.docx
- elife_poa_e18044_Figure_4_figure_supplement_2.pdf
- elife_poa_e18044_Figure_8_figure_supplement_6.pdf
- elife_poa_e18044_Figure_2_figure_supplement_1.pdf
- elife_poa_e18044_Supplementary_File_2.docx
- elife_poa_e18044_Figure_8_figure_supplement_5.pdf
- elife_poa_e18044_Figure_6_figure_supplement_3.pdf
- elife_poa_e18044_Figure_7_figure_supplement_4.pdf
