# Supplementary material for: Dopamine neurons learn relative chosen value from probabilistic rewards
Source: eLife journal article supplement (doi:10.7554/elife.18044), 2016-10-27
Supplement: supp [file elife-18044-supp-v1.zip › elife_poa_e18044_Supplementary_File_1.docx]

RW: Constant learning rate, no novelty term

RW&N: Constant learning rate, with novelty term

Decay: Decaying learning rate (), no novelty term

Decay&N: Decaying learning rate (),), with novelty term

PH: Adaptive learning rate (), no novelty term

PH&N: Adaptive learning rate (), with novelty term

| Model |  |  |  |  |  | BIC |
| --- | --- | --- | --- | --- | --- | --- |
| RW | 0.32 | NA | NA | NA | NA | 5990 |
| RW&N | 0.28 | NA | Na | NA | 1.03 | 5926 |
| Decay | NA | 1.32 | NA | NA | NA | 5948 |
| Decay&N | NA | 1.21 | NA | NA | 0.9 | 5913 |
| PH | NA | NA | 0.13 | 0.7 | NA | 5888 |
| PH&N | NA | NA | 0.13 | 0.7 | 0.95 | 5861 |

: Fixed learning rate for novel cue

: Decay constant for novel cue

: Parameter of Pearce-Hall model for novel cue

: Learning rate on the first trial of Pearce-Hall model for novel cue

: Decay constant of novelty term
