# Supplementary material for: Dopamine neurons learn relative chosen value from probabilistic rewards
Source: eLife journal article supplement (doi:10.7554/elife.18044), 2016-10-27
Supplement: supp [file elife-18044-supp-v1.zip › elife_poa_e18044_Supplementary_File_2.docx]

RW: Constant learning rate, no novelty term

RW&N: Constant learning rate, with novelty term

Decay: Decaying learning rate (), no novelty term

Decay&N: Decaying learning rate (),), with novelty term

PH: Adaptive learning rate (), no novelty term

PH&N: Adaptive learning rate (), with novelty term

Monkey A

| Model |  |  |  |  |  |  |  |  |  |  | BIC |
| --- | --- | --- | --- | --- | --- | --- | --- | --- | --- | --- | --- |
| RW | 0.4 | 0.13 | NA | NA | NA | NA | NA | NA | NA | 0.09 | 2833 |
| RW&N | 0.4 | 0.11 | NA | NA | NA | NA | NA | NA | 1.21 | 0.07 | 2817 |
| Decay | NA | NA | 0.5 | 0.89 | NA | NA | NA | NA | NA | 0.09 | 2831 |
| Decay&N | NA | NA | 0.54 | 0.94 | NA | NA | NA | NA | 0.47 | 0.09 | 2823 |
| PH | NA | NA | NA | NA | 0.31 | 0.22 | 0.67 | 0.06 | NA | 0.09 | 2812 |
| PH&N | NA | NA | NA | NA | 0.25 | 0.15 | 0.7 | 0.05 | 0.91 | 0.08 | 2682 |

Monkey B

| Model |  |  |  |  |  |  |  |  |  |  | BIC |
| --- | --- | --- | --- | --- | --- | --- | --- | --- | --- | --- | --- |
| RW | 0.39 | 0.15 | NA | NA | NA | NA | NA | NA | NA | 0.08 | 1718 |
| RW&N | 0.39 | 0.16 | NA | NA | NA | NA | NA | NA | 1.23 | 0.08 | 1697 |
| Decay | NA | NA | 0.49 | 0.83 | NA | NA | NA | NA | NA | 0.08 | 1689 |
| Decay&N | NA | NA | 0.36 | 0.72 | NA | NA | NA | NA | 0.81 | 0.07 | 1688 |
| PH | NA | NA | NA | NA | 0.28 | 0.19 | 0.66 | 0.07 | NA | 0.08 | 1685 |
| PH&N | NA | NA | NA | NA | 0.23 | 0.14 | 0.7 | 0.04 | 0.99 | 0.08 | 1621 |

: Fixed learning rate for novel cue

: Fixed learning rate for familiar cue

: Decay constant for novel cue

: Decay constant for familiar cue

: Parameter of Pearce-Hall model for novel cue

: Parameter of Pearce-Hall model for familiar cue

: Learning rate on the first trial of Pearce-Hall model for novel cue

: Learning rate on the first trial of Pearce-Hall model for familiar cue

: Decay constant of novelty term

: Temperature parameter of softmax function
