# Supplementary figures and images for: Dopamine neurons learn relative chosen value from probabilistic rewards
Source: eLife journal article supplement (doi:10.7554/elife.18044), 2016-10-27

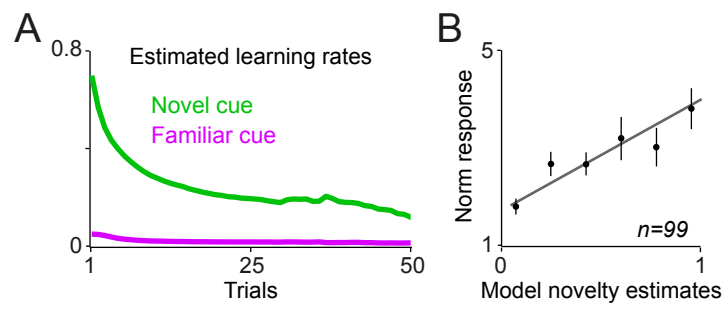

Figure 8-figure supplement 6

Supplement: supp [file elife-18044-supp-v1.zip]

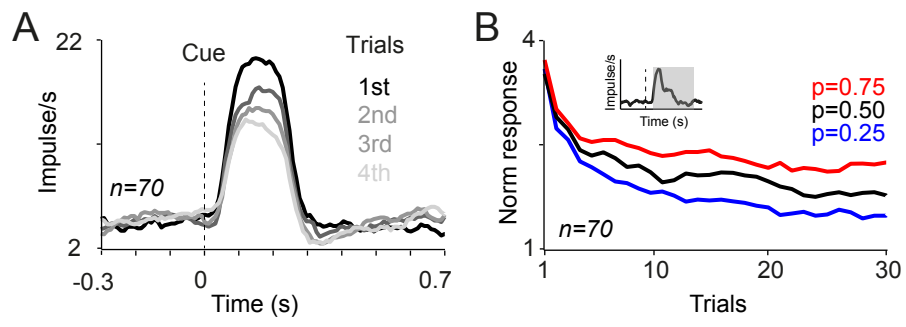

Figure 2-figure supplement 1

Supplement: supp [file elife-18044-supp-v1.zip]

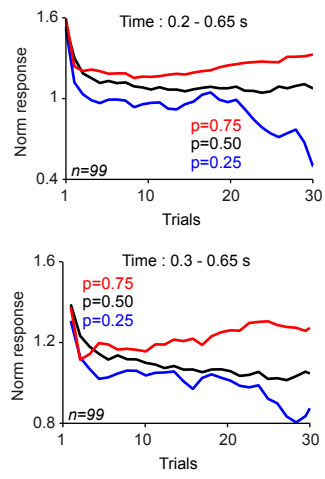

Figure 6-figure supplement 3

Supplement: supp [file elife-18044-supp-v1.zip]

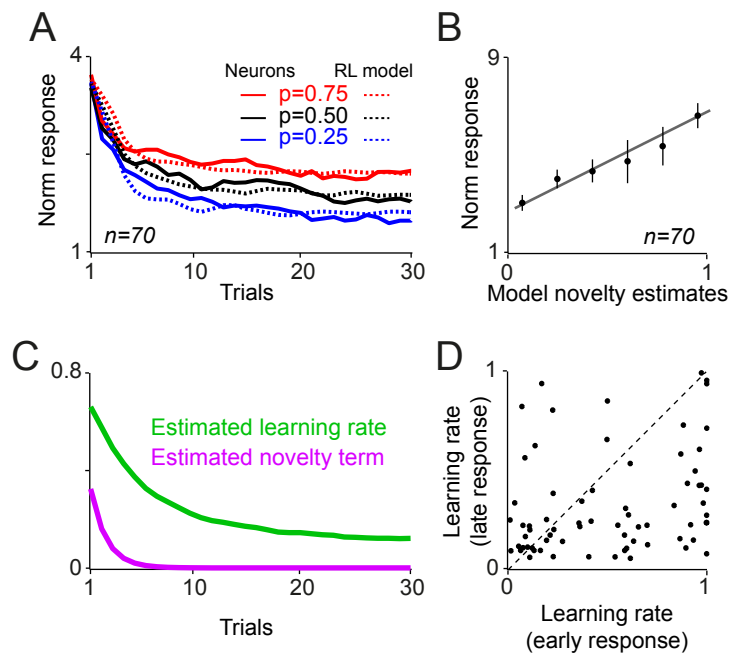

Figure 4-figure supplement 2

Supplement: supp [file elife-18044-supp-v1.zip › elife_poa_e18044_Figure_4_figure_supplement_2.pdf]

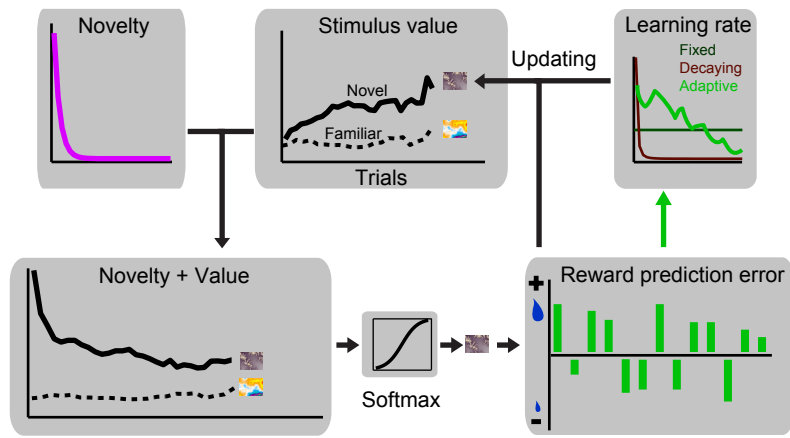

Figure 8-figure supplement 5

Supplement: supp [file elife-18044-supp-v1.zip › elife_poa_e18044_Figure_8_figure_supplement_5.pdf]

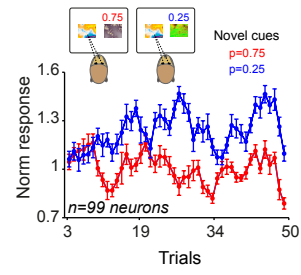

Figure 7-figure supplement 4

Supplement: supp [file elife-18044-supp-v1.zip › elife_poa_e18044_Figure_7_figure_supplement_4.pdf]
